# Supplementary material
Source: Springer Nature journal article supplement (https://www.springermedizin.de/resource/supplementary/12936_2012_2603_MOESM3_ESM.pdf/9543244)
Supplement: MOESM3 [file 9543244]

| Row Labels                  | % of readings (°C) above recommended |                      |                       |                    |             |             |       |                         |     |       |     |
|-----------------------------|--------------------------------------|----------------------|-----------------------|--------------------|-------------|-------------|-------|-------------------------|-----|-------|-----|
|                             | Values                               |                      |                       | % of readings (°C) |             |             |       | limit °C of RDTs in use |     |       |     |
|                             | Min of Readings (°C)                 | Max of Readings (°C) | Max of Readings (%RH) | ≤ 30               | 30 < x ≤ 35 | 35 < x ≤ 40 | >40   | >30                     | >37 | >40   | >45 |
| <b>Burkina Faso</b>         | <b>13.6</b>                          | <b>42.7</b>          | <b>100</b>            |                    |             |             |       |                         |     |       |     |
| Bobo Dioulasso              |                                      |                      |                       |                    |             |             |       |                         |     |       |     |
| Regional Warehouse (A7)     | 17.1                                 | 35.5                 | 80.3                  | 61.57              | 38.00       | 0.43        | 0.00  |                         |     | 0.00  |     |
| Dori                        | 24.2                                 | 42.7                 | 83                    |                    |             |             |       |                         |     |       |     |
| Health District (B5)        | 24.2                                 | 42.7                 | 72.5                  | 21.06              | 47.15       | 27.89       | 3.89  |                         |     | 3.89  |     |
| Health Center (C5)          | 24.2                                 | 41.3                 | 83                    | 26.59              | 45.72       | 26.23       | 1.46  |                         |     | 1.46  |     |
| Gaoua                       | 13.6                                 | 39.4                 | 100                   |                    |             |             |       |                         |     |       |     |
| Health District (B1)        | 13.6                                 | 39.4                 | 100                   | 45.48              | 53.54       | 0.98        | 0.00  |                         |     | 0.00  |     |
| Health Center (C1)          | 18.8                                 | 35.9                 | 100                   | 74.38              | 25.37       | 0.25        | 0.00  |                         |     | 0.00  |     |
| Nouna                       | 17.4                                 | 41.8                 | 93.2                  |                    |             |             |       |                         |     |       |     |
| Health District (B3)        | 17.4                                 | 34.9                 | 79.7                  | 93.78              | 6.22        | 0.00        | 0.00  |                         |     | 0.00  |     |
| Health Center (C3)          | 20.7                                 | 41.8                 | 93.2                  | 38.76              | 41.91       | 18.15       | 1.18  |                         |     | 1.18  |     |
| Ouagadougou                 |                                      |                      |                       |                    |             |             |       |                         |     |       |     |
| Central Warehouse (A1)      | 26.2                                 | 34                   | 81.5                  | 52.30              | 47.70       | 0.00        | 0.00  |                         |     | 0.00  |     |
| <b>Philippines</b>          | <b>21.2</b>                          | <b>36.4</b>          | <b>100</b>            |                    |             |             |       |                         |     |       |     |
| Cawag, Subic, Zambales City |                                      |                      |                       |                    |             |             |       |                         |     |       |     |
| Health Facility (C5)        | 21.2                                 | 36.4                 | 100                   | 79.86              | 19.71       | 0.43        | 0.00  | 0.00                    |     | 0.00  |     |
| Manila                      |                                      |                      |                       |                    |             |             |       |                         |     |       |     |
| Central Warehouse (A1)      | 24.7                                 | 34.2                 | 98.8                  | 76.29              | 23.71       | 0.00        | 0.00  | 0.00                    |     | 0.00  |     |
| Palawan                     |                                      |                      |                       |                    |             |             |       |                         |     |       |     |
| Health Facility (C1)        | 23.9                                 | 35.8                 | 100                   | 72.92              | 26.73       | 0.35        | 0.00  | 0.00                    |     | 0.00  |     |
| Quezon                      |                                      |                      |                       |                    |             |             |       |                         |     |       |     |
| Regional Warehouse (B1)     | 23.4                                 | 33.6                 | 84.2                  | 72.98              | 27.02       | 0.00        | 0.00  | 0.00                    |     | 0.00  |     |
| Health Facility (C3)        | 21.9                                 | 36.1                 | 98.3                  | 86.42              | 13.56       | 0.02        | 0.00  | 0.00                    |     | 0.00  |     |
| Tuguegarao                  |                                      |                      |                       |                    |             |             |       |                         |     |       |     |
| Regional Warehouse (B3)     | 22.6                                 | 36.4                 | 86.2                  | 63.66              | 35.66       | 0.67        | 0.00  | 0.00                    |     | 0.00  |     |
| <b>Senegal</b>              | <b>19.2</b>                          | <b>47.6</b>          | <b>98.9</b>           |                    |             |             |       |                         |     |       |     |
| Guédiawaye                  |                                      |                      |                       |                    |             |             |       |                         |     |       |     |
| District Pharmacy (C8)      | 23.9                                 | 32.4                 | 82.7                  | 76.02              | 23.98       | 0.00        | 0.00  |                         |     | 0.00  |     |
| Dakar                       |                                      |                      |                       |                    |             |             |       |                         |     |       |     |
| National Warehouse (A2)     | 20.9                                 | 31.3                 | 95.2                  | 96.90              | 3.10        | 0.00        | 0.00  |                         |     | 0.00  |     |
| Kolda                       |                                      |                      |                       |                    |             |             |       |                         |     |       |     |
| Regional warehouse (A6)     | 19.2                                 | 38.3                 | 78                    | 66.94              | 24.62       | 8.44        | 0.00  |                         |     | 0.00  |     |
| Kouankané                   |                                      |                      |                       |                    |             |             |       |                         |     |       |     |
| Pharmacy/Health post (C4)   | 20.6                                 | 37.4                 | 91.9                  | 59.51              | 35.23       | 5.26        | 0.00  |                         |     | 0.00  |     |
| Lingéwal                    |                                      |                      |                       |                    |             |             |       |                         |     |       |     |
| Pharmacy/Health post (C6)   | 21.5                                 | 40.9                 | 98.9                  | 51.70              | 36.08       | 12.12       | 0.10  |                         |     | 0.10  |     |
| Matam                       |                                      |                      |                       |                    |             |             |       |                         |     |       |     |
| District Pharmacy (B1)      | 25.4                                 | 40.3                 | 75.2                  | 16.03              | 55.23       | 28.60       | 0.15  |                         |     | 0.15  |     |
| Nabadaji                    |                                      |                      |                       |                    |             |             |       |                         |     |       |     |
| Pharmacy/Health post (B3)   | 23.1                                 | 47.6                 | 71.3                  | 10.71              | 35.28       | 35.78       | 18.24 |                         |     | 18.24 |     |
| Nimzatt                     |                                      |                      |                       |                    |             |             |       |                         |     |       |     |
| Health Post (C10)           | 22.6                                 | 34.6                 | 85                    | 69.18              | 30.52       | 0.30        | 0.00  |                         |     | 0.00  |     |
| Ourrossogui                 |                                      |                      |                       |                    |             |             |       |                         |     |       |     |
| Regional warehouse (A4)     | 22.4                                 | 41.8                 | 85.7                  | 21.44              | 47.55       | 29.66       | 1.36  |                         |     | 1.36  |     |
| Velingara                   |                                      |                      |                       |                    |             |             |       |                         |     |       |     |
| District Pharmacy (C1)      | 22.6                                 | 41.1                 | 94.5                  | 34.80              | 46.13       | 18.51       | 0.56  |                         |     | 0.56  |     |
| <b>Ethiopia</b>             | <b>8.3</b>                           | <b>43.7</b>          | <b>94</b>             |                    |             |             |       |                         |     |       |     |
| Afar                        | 22                                   | 43.7                 | 82.5                  |                    |             |             |       |                         |     |       |     |
| Health center (C11)         | 24.9                                 | 43.7                 | 66.7                  | 19.66              | 36.90       | 35.80       | 7.64  | 80.34                   |     | 0.00  |     |
| Health post (C21)           | 22                                   | 41.1                 | 82.5                  | 43.57              | 42.09       | 14.31       | 0.02  | 56.43                   |     | 0.00  |     |
| Health post (C23)           | 25.1                                 | 40.9                 | 66.6                  | 23.80              | 46.96       | 28.24       | 1.00  | 76.20                   |     | 0.00  |     |
| Regional Warehouse (C6)     | 23.3                                 | 42.2                 | 72.9                  | 21.05              | 66.60       | 12.31       | 0.04  | 78.95                   |     | 0.00  |     |
| Amhara                      | 14.7                                 | 32.7                 | 88.4                  |                    |             |             |       |                         |     |       |     |
| Health post (C17)           | 14.7                                 | 32.7                 | 88.4                  | 99.07              | 0.93        | 0.00        | 0.00  | 0.93                    |     | 0.00  |     |
| Health post (C19)           | 16.8                                 | 32.5                 | 81.6                  | 99.98              | 0.02        | 0.00        | 0.00  | 0.02                    |     | 0.00  |     |
| Regional Warehouse (C3)     | 17.3                                 | 31.3                 | 71.9                  | 99.03              | 0.97        | 0.00        | 0.00  | 0.97                    |     | 0.00  |     |
| Health center (C9)          | 19.5                                 | 29.6                 | 81.3                  | 100.00             | 0.00        | 0.00        | 0.00  | 0.00                    |     | 0.00  |     |
| Oromia                      | 8.3                                  | 33.3                 | 94                    |                    |             |             |       |                         |     |       |     |
| Central Warehouse (A1)      | 8.3                                  | 33                   | 94                    | 99.08              | 0.92        | 0.00        | 0.00  | 0.92                    |     | 0.00  |     |
| Regional Warehouse (C1)     | 16.6                                 | 33.3                 | 70.6                  | 99.96              | 0.04        | 0.00        | 0.00  | 0.04                    |     | 0.00  |     |
| Health post (C13)           | 17.6                                 | 30.8                 | 85.2                  | 99.96              | 0.04        | 0.00        | 0.00  | 0.04                    |     | 0.00  |     |
| Health post (C15)           | 17                                   | 31.6                 | 85.6                  | 99.98              | 0.02        | 0.00        | 0.00  | 0.02                    |     | 0.00  |     |
| Health center (C7)          | 16.2                                 | 29.3                 | 84.5                  | 100.00             | 0.00        | 0.00        | 0.00  | 0.00                    |     | 0.00  |     |
